# Supplementary material for: Teaching life cycle assessment in environmental engineering: a disinfection case study for students
Source: Springer Nature journal article supplement (doi:10.1007/s11367-016-1138-1), 2016-06-04
Supplement: MOESM2 [file 10257794]

## Sheet: Concrete, Chlorine
Base Flow, 8 MGD average flow				4 MGD average flow				2 MGD average flow				1 MGD average flow				12 MGD average flow
																					Summary Table
Flow	8	MGD		Flow	4	MGD		Flow	2	MGD		Flow	1	MGD		Flow	12	MGD			Flow	Lr	Wr	Dr	Va	HRTa	Concrete	R. Steel
Peaking Factor	3			Peaking Factor	3			Peaking Factor	3			Peaking Factor	3			Peaking Factor	3				MGD	ft	ft	ft	cf	min	kg	kg
Peak Flow	24	MGD		Peak Flow	12	MGD		Peak Flow	6	MGD		Peak Flow	3	MGD		Peak Flow	36	MGD			1	65	7	10	4550	16.3363	393637	2822.14
	2228.16	ft3/min			1114.08	ft3/min			557.041	ft3/min			278.52	ft3/min			3342.25	ft3/min			2	90	10	10	9000	16.1568	628704	4425.01
																					4	130	13	10	16900	15.1694	1.02231e+06	7082.32
HRT =	15	min		HRT =	15	min		HRT =	15	min		HRT =	15	min		HRT =	15	min			8	180	18.5	10	33300	14.945	1.72007e+06	11637.9
																					12	225	23	10	51750	15.4836	2.45932e+06	16396.5
Vol req'd	33422.5	ft3		Vol req'd	16711.2	ft3		Vol req'd	8355.61	ft3		Vol req'd	4177.81	ft3		Vol req'd	50133.7	ft3
Depth	10	ft		Depth	10	ft		Depth	10	ft		Depth	10	ft		Depth	10	ft
Area req'd	3342.25	ft2		Area req'd	1671.12	ft2		Area req'd	835.561	ft2		Area req'd	417.781	ft2		Area req'd	5013.37	ft2
L:W	10	to 1		L:W	10	to 1		L:W	10	to 1		L:W	10	to 1		L:W	10	to 1
Width	18.2818	feet		Width	12.9272	feet		Width	9.14091	feet		Width	6.4636	feet		Width	22.3906	feet
Length	182.818	feet		Length	129.272	feet		Length	91.4091	feet		Length	64.636	feet		Length	223.906	feet
Rounded				Rounded				Rounded				Rounded				Rounded
Length	180	feet		Length	130	feet		Length	90	feet		Length	65	feet		Length	225	feet
Width	18.5	feet		Width	13	feet		Width	10	feet		Width	7	feet		Width	23	feet
Depth	10	feet		Depth	10	feet		Depth	10	feet		Depth	10	feet		Depth	10	feet
Vol =	33300	feet3		Vol =	16900	feet3		Vol =	9000	feet3		Vol =	4550	feet3		Vol =	51750	feet3			Regression equations for Flow-Pacing Concrete and Reinforcing Steel Requirements
Actual HRT =	14.945	min		Actual HRT =	15.1694	min		Actual HRT =	16.1568	min		Actual HRT =	16.3363	min		Actual HRT =	15.4836	min
																						Concrete, kg = 185,131 kg/MGD * Flow, MGD + 245,102
Slab =	14985	feet3		Slab =	7605	feet3		Slab =	4050	feet3		Slab =	2047.5	feet3		Slab =	23287.5	feet3				Steel, kg = 1,215 kg/MGD * Flow, MGD + 1,911
Side Walls =	4680	feet3		Side Walls =	3380	feet3		Side Walls =	2340	feet3		Side Walls =	1690	feet3		Side Walls =	5850	feet3			(Assumes linearity within the region of interest, 1 - 12 mgd)
End Walls =	1443	feet3		End Walls =	1014	feet3		End Walls =	780	feet3		End Walls =	546	feet3		End Walls =	1794	feet3
Baffle Walls =	4199	feet3		Baffle Walls =	3042	feet3		Baffle Walls =	2080	feet3		Baffle Walls =	1508	feet3		Baffle Walls =	5252	feet3
Sum of concrete =	25307	feet3		Sum of concrete =	15041	feet3		Sum of concrete =	9250	feet3		Sum of concrete =	5791.5	feet3		Sum of concrete =	36183.5	feet3
	716.694	m3			425.961	m3			261.96	m3			164.015	m3			1024.72	m3
Mass of concrete =	1.72007e+06	kg		Mass of concrete =	1.02231e+06	kg		Mass of concrete =	628704	kg		Mass of concrete =	393637	kg		Mass of concrete =	2.45932e+06	kg
Slab and Wall Thicknesses in Metric Units:
	Slab	45.72	cm
	Walls	30.48	cm
Cost Data, For 8 MGD Scenario only
Surface Areas for calculating slab concrete and formed wall concrete
RSMeans Entries:	03 11 13.65 Edge forms, wood, 4 use, on grade, Over 12"
	03 11 13.85 Forms in Place, Walls, 9260 Steel framed plywood, based on 50 uses, 4 uses of bracing lumber, over 8' to 16' high
	03 31 05 Normal Weight Structural Concrete, Ready Mix, 0100, 2,500 psi (ignore additives and treatments)
	03 31 05.70 Normal Weight Structural Concrete, Placing Concrete, 4600 Slab on grade, over 6" thick, direct chute
	03 31 05.70 Normal Weight Structural Concrete, Placing Concrete, 5050 Walls, 12" thick, direct chute
Reference:	RSMeans (2012) Green Building Cost Data, 2013, 3rd. Ed. Construction Publishers & Consultants, Norwell, MA.
Forms in Place (includes bracing and shoring
Slab concrete	706.5	ft2 contact area (sfca)
Unit Cost (2013):	6.85	per sfca
Side Walls	7200	sfca
End Walls	2220	sfca
Baffle Walls	6460	sfca
Total Wall forming	15880	sfca
Unit Cost (2013):	7.8	(see reference above)
Total Forms Cost:	128704
Cast-in-Place Concrete, Materials:
Concrete Mat'l:	937.296	cy
Unit Cost (2013):	103	for 2,500 psi concrete
Total Concrete	96541.5	for concrete material
Cast-in-Place Concrete, Placing:
Slab Concrete	555	cy
Unit Cost (2013):	16.9	per cy
Wall Concrete	382.296	cy
Unit Cost (2013):	27.5	per cy
Placing Concrete:	19892.6
Total Concrete work:	245138
CCI 2013:	9547
CCI Current (2015):	9961.75
Adjusted Cost:	255787
Rebar cost from other worksheet
	27802.3
Total Cost:	283590	for concrete and reinforcing steel for chlorine and hypochlorite alternatives.

## Sheet: Rebar, Chlorine
Base Flow, MGD	8	MGD		4 MGD			2 MGD			1	MGD		12	MGD
Length	180			130			90			65			225
Width (each of 3 channels)	18.5			13			10			7			23			See concrete page for summary and regression
Depth (w/out freebrd.)	10			10			10			10			10
Assume	1	ft clearance between bars and edge of concrete on both sides
		Some calculations factor this in, others may assume or neglect bends and overlap into adjacent slab/walls
Slab Long. Rebar	9630	ft		4810	ft		2520	ft		1235	ft		15075	ft
Slab Horiz. Rebar	9879	ft		4992	ft		2640	ft		1323	ft		15387	ft
Side Wall vert. rebar	4628	feet		3328	feet		2288	feet		1638	feet		5798	feet
Side Wall horiz rebar	3960	feet		2860	feet		1980	feet		1430	feet		4950	feet
End Wall vert. rebar	1391	feet		962	feet		728	feet		494	feet		1742	feet
End Wall horiz. Rebar	1221	feet		858	feet		660	feet		462	feet		1518	feet
Baffle Wall vert. rebar	4147	feet		2990	feet		2028	feet		1456	feet		5200	feet
Baffle Wall horiz. Rebar	3553	feet		2574	feet		1760	feet		1276	feet		4444	feet
Total Rebar	38409	feet		23374	feet		14604	feet		9314	feet		54114	feet
Assume an average
unit mass of rebar	0.668	lb/ft		0.668	lb/ft		0.668	lb/ft		0.668	lb/ft		0.668	lb/ft
Mass of rebar	11637.9	kg		7082.32	kg		4425.01	kg		2822.14	kg		16396.5	kg
Unit mass of rebar, SI units	1.00233	kg/m
Cost Data, For 8 MGD Scenario only
Same reference as listed on prior worksheet
RSMeans Entry:	For slabs:	03 21 10.60 Reinforcing in Place, Slab on grade, #3-#7
	For walls:	03 21 10.60 Reinforcing in Place, Walls, #3-#7
Slab reinf. steel:	6.51601	ton
Unit Cost, 2013:	2200	per ton
Slab steel cost, 2013:	14335.2
Wall reinf. steel:	6.3126	ton
Unit Cost, 2013:	1950	per ton
Wall steel cost, 2013:	12309.6
Total cost, 2013:	26644.8
CCI 2013:	9547
CCI Current (2015):	9961.75
Adjusted Cost:	27802.3

## Sheet: Concrete, UV
Base Flow, 8 MGD average flow				4 MGD average flow				2 MGD average flow				1 MGD average flow				12 MGD average flow
Flow	8	MGD		Flow	4	MGD		Flow	2	MGD		Flow	1	MGD		Flow	12	MGD		Summary Table
Peaking Factor	3			Peaking Factor	3			Peaking Factor	3			Peaking Factor	3			Peaking Factor	3
Peak Flow	24	MGD		Peak Flow	12	MGD		Peak Flow	6	MGD		Peak Flow	3	MGD		Peak Flow	36	MGD		Flow	Lr	Wr	Dr	Va	HRTa	Concrete	R. Steel
																				MGD	ft	ft	ft	cf	min	kg	kg
																				1	60	4	5	1200	n/a	128867	832.878
Rounded				Rounded				Rounded				Rounded				Rounded				2	70	4	5	1400	n/a	149258	966.236
Length	90	feet		Length	80	feet		Length	70	feet		Length	60	feet		Length	110	feet		4	80	4	5	1600	n/a	169648	1099.59
Width	4	feet		Width	4	feet		Width	4	feet		Width	4	feet		Width	4	feet		8	90	4	5	1800	n/a	190039	1232.95
Depth	5	feet		Depth	5	feet		Depth	5	feet		Depth	5	feet		Depth	5	feet		12	110	4	5	2200	n/a	230819	1499.67
Freeboard	1	foot		Freeboard	1	foot		Freeboard	1	foot		Freeboard	1	foot		Freeboard	1	foot
Vol =	1800	feet3		Vol =	1600	feet3		Vol =	1400	feet3		Vol =	1200	feet3		Vol =	2200	feet3
Slab =	1080	feet3		Slab =	960	feet3		Slab =	840	feet3		Slab =	720	feet3		Slab =	1320	feet3
Side Walls =	1620	feet3		Side Walls =	1440	feet3		Side Walls =	1260	feet3		Side Walls =	1080	feet3		Side Walls =	1980	feet3
(incl. center wall)				(incl. center wall)				(incl. center wall)				(incl. center wall)				(incl. center wall)
End Walls =	96	feet3		End Walls =	96	feet3		End Walls =	96	feet3		End Walls =	96	feet3		End Walls =	96	feet3
Sum of concrete =	2796	feet3		Sum of concrete =	2496	feet3		Sum of concrete =	2196	feet3		Sum of concrete =	1896	feet3		Sum of concrete =	3396	feet3
	79.1827	m3			70.6867	m3			62.1907	m3			53.6947	m3			96.1747	m3
Mass of concrete =	190039	kg			169648	kg			149258	kg			128867	kg			230819	kg
																				Regression equations for Flow-Pacing Concrete and Reinforcing Steel Requirements
																					Concrete, kg = 8,480 kg/MGD * Flow, MGD + 127,936
																					Steel, kg = 55.5 kg/MGD * Flow, MGD + 827
Cost Data, For 8 MGD Scenario only																				(Assumes linearity within the region of interest, 1 - 12 mgd)
Surface Areas for calculating slab concrete and formed wall concrete
RSMeans Entries:	03 11 13.65 Edge forms, wood, 4 use, on grade, Over 12"
	03 11 13.85 Forms in Place, Walls, 9060 Steel framed plywood, based on 50 uses, 4 uses of bracing lumber, to 8' high
	03 31 05 Normal Weight Structural Concrete, Ready Mix, 0100, 2,500 psi (ignore additives and treatments)
	03 31 05.70 Normal Weight Structural Concrete, Placing Concrete, 4600 Slab on grade, over 6" thick, direct chute
	03 31 05.70 Normal Weight Structural Concrete, Placing Concrete, 5050 Walls, 12" thick, direct chute
Reference:	RSMeans (2012) Green Building Cost Data, 2013, 3rd. Ed. Construction Publishers & Consultants, Norwell, MA.
Forms in Place (includes bracing and shoring
Slab concrete	294	ft2 contact area (sfca)
Unit Cost (2013):	6.85	per sfca
Side Walls	2160	sfca
End Walls	192	sfca
Divider Wall	1080	sfca
Total Wall forming	3432	sfca
Unit Cost (2013):	7.8	(see reference above)
Total Forms Cost:	28783.5
Cast-in-Place Concrete, Materials:
Concrete Mat'l:	103.556	cy
Unit Cost (2013):	103	for 2,500 psi concrete
Total Concrete	10666.2	for concrete material
Cast-in-Place Concrete, Placing:
Slab Concrete	40	cy
Unit Cost (2013):	16.9	per cy
Wall Concrete	63.5556	cy
Unit Cost (2013):	27.5	per cy
Placing Concrete:	2423.78
Total Concrete work:	41873.5
CCI 2013:	9547
CCI Current (2015):	9961.75
Adjusted Cost:	43692.6
Rebar cost from other worksheet:
	2872.98
Total Cost:	46565.6	for concrete and reinforcing steel for UV alternative

## Sheet: Rebar, UV
Base Flow, MGD	8	MGD		4 MGD			2 MGD			1	MGD		12	MGD
Length	90			80			70			60			110
Width	4			4			4			4			4
Depth	5			5			5			5			5			See 'Concrete, UV' worksheet for summary and regression on reinf. steel.
Assume	1	ft clearance between bars and edge of concrete on both sides
		Some calculations factor this in, others may assume or neglect bends and overlap into adjacent slab/walls
Slab Long. Rebar	540	ft		480	ft		420	ft		360	ft		660	ft
Slab Horiz. Rebar	704	ft		624	ft		544	ft		464	ft		864	ft
Side Wall vert. rebar	1584	feet		1404	feet		1224	feet		1044	feet		1944	feet
Side Wall horiz rebar	1080	feet		960	feet		840	feet		720	feet		1320	feet
(incl. center wall)
End Wall vert. rebar	96	feet		96	feet		96	feet		96	feet		96	feet
End Wall horiz. Rebar	64	feet		64	feet		64	feet		64	feet		64	feet
Total Rebar	4068	feet		3628	feet		3188	feet		2748	feet		4948	feet
Assume an average
desity of rebar	0.668	lb/ft		0.668	lb/ft		0.668	lb/ft		0.668	lb/ft		0.668	lb/ft
Mass of rebar	1232.95	kg		1099.59	kg		966.236	kg		832.878	kg		1499.67	kg
Cost Data, For 8 MGD Scenario only
Same reference as listed on prior worksheet
RSMeans Entry:	For slabs:	03 21 10.60 Reinforcing in Place, Slab on grade, #3-#7
	For walls:	03 21 10.60 Reinforcing in Place, Walls, #3-#7
Slab reinf. steel:	0.415496	ton
Unit Cost, 2013:	2200	per ton
Slab steel cost, 2013:	914.091
Wall reinf. steel:	0.943216	ton
Unit Cost, 2013:	1950	per ton
Wall steel cost, 2013:	1839.27
Total cost, 2013:	2753.36
CCI 2013:	9547
CCI Current (2015):	9961.75
Adjusted Cost:	2872.98

## Sheet: Chemicals and Elec
Chlorine Demand for Cl2					SO2 demand for Cl2 Dechlor
6	mg/L				2	mg/L residual
8	MGD				0.9	mg SO2 / mg/L residual
400.32	lb/day at 8 MGD				8	MGD
					120.096	lb/day at 8 MGD
1	MGD				1	MGD
50.04	lb/MGD/day				15.012	lb / MGD / day
22.7042	kg/MGD/day				6.81125	kg/MGD/day
It is assumed that the electricity requirement for chlorination (with Cl2) and dechlorination is negligible
consisting of instrumentation and passive feeders.
NaOCl demand
										Summary Table
8	MGD
6	mg/L										Cl2/SO2 Disinfection			NaOCl/Na2SO3 Disinfection			UV Disinf.
400.32	lb/day of chlorine demand									Flow	Cl2	SO2	Electricity	NaOCl	Na2SO3	Electricity	Electricity
										MGD	kg	kg	kWh/day	kg	kg	kWh/day	kWh/day
150000	mg/L = approx. concentration of a 15% by wt trade solution									1	22.7042	6.81125	0	22.71	12.11	8.952	94.625
										2	45.4083	13.6225	0	45.42	24.21	17.904	189.25
0.00032	mgd of hypochlorite flow required									4	90.8167	27.245	0	90.84	48.42	35.808	378.5
13.3333	gallons per hour				243.2	dollars per day				8	181.633	54.49	0	181.68	96.9	71.616	757
										12	272.45	81.735	0	272.52	145.27	107.424	1135.5
1.25132	lb/gallon of active NaOCl, approximate
181.68	kg/day of active NaOCl fed to system (not including
	the water in solution, so as to be consistent with
	the LCI unit process data).
Because this calculation is proportional to flow, it scales linearly with flow rate.
Sodium Sulfite for dechlorination from NaOCl
8	MGD Flow rate
2	mg/L chlorine residual to dechlorinate, assumed
1.6	Mass ratio of sodium sulfite to chlorine residual (M&E, 2003 version, Ch. 12, p 1263)
3.2	mg/L Na2SO3 dose required for dechlorination
213.504	lb/day of Na2SO3
96.8448	kg/day of Na2SO3 at 8 mgd
										Equations for Flow-Pacing Chemical and Electricity Requirements
Because this calculation is proportional to flow, it scales linearly with flow rate.
											Cl2, kg/day = 22.7 * Flow, MGD
For hypochlorite and sulfite, it was assumed that small chemical feed pumps are required.											SO2, kg/day = 6.81 * Flow, MGD
Connected horsepower was estimated at						0.5	HP/MG				NaOCl, kg/day = 22.7 * Flow, MGD
											Na2SO3, kg/day = 12.1 * Flow, MGD
											Elec (Hypo), kWh/day = 8.95 * Flow, MGD
											Elec (UV), kWh/day = 94.6 * Flow, MGD
Electricity for UV Disinfection
Calculations related to above text:
Lee et al., 2012		0.052	Wh/L
Young, 2008		0.0184941	Wh/L, or	70	kWh/mg
		0.0264201	Wh/L, or	100	kWh/mg
Hach Application Note:
		48	MGD treated for		6198	hours
	equals	12396	MG treated
	Electricity consumed:
		2605422	kWh total for dose paced
		3929216	kWh total for assuming fixed 60% UVT
		210.182	to	316.975	kWh/MG
	or	0.0555304	to	0.0837449	Wh/L
	So (as noted above):		0.025	Wh/L	was selected as the power input for UV disinfection.
		Flow	Flow	Elec	Elec
		MGD	L/day	Wh/d	kWh/day
		1	3785000	94625	94.625
		2	7570000	189250	189.25
		4	15140000	378500	378.5
		8	30280000	757000	757
		12	45420000	1135500	1135.5

## Sheet: UV Materials
UV System Components, from Lee et al. (2012), Int. J. LCA.
Data taken from Table 3.
					Mass, scaled to
System Component	Material	Mass, kg	Equivalent source in Ecoinvent LCI database		8 mgd, kg
Quartz Sleeve	Pure quartz	230	Glass tube, borosilicate {GLO} market for, Alloc Def, U		69.6558
Ballast 92	Painted steel	200	Steel, low-alloyed, hot rolled {GLO} market for, Alloc Def, U		60.5702
Flood Gate	304 SS	160	Steel, chromium steel 18/8 {GLO} market for, Alloc Def,U		48.4562
Lubricant, mL		120			36.3421
UV Lamp	UV Glass	100	Glass tube, borosilicate {GLO} market for, Alloc Def, U		30.2851
Junction Box	304 SS	86	Steel, chromium steel 18/8 {GLO} market for, Alloc Def,U		26.0452
Hoist	400 SS	85	Steel, chromium steel 18/8 {GLO} market for, Alloc Def,U		25.7423
Sensor bracketing	304 SS	50	Steel, chromium steel 18/8 {GLO} market for, Alloc Def,U		15.1426
Pneumatic cylinder	Coated Al	30	Aluminum, primary, liquid {GLO} market for, Alloc Def, U		9.08553
Module Frame	316 SS	24	Steel, chromium steel 18/8 {GLO} market for, Alloc Def,U		7.26843
UV module	316 SS	24	Steel, chromium steel 18/8 {GLO} market for, Alloc Def,U		7.26843
Washing equipment	316 SS	16	Steel, chromium steel 18/8 {GLO} market for, Alloc Def,U		4.84562
Shaft	304 SS	12	Steel, chromium steel 18/8 {GLO} market for, Alloc Def,U		3.63421
Bracketing	304 SS	10	Steel, chromium steel 18/8 {GLO} market for, Alloc Def,U		3.02851
Bevel Gear	304 SS	8	Steel, chromium steel 18/8 {GLO} market for, Alloc Def,U		2.42281
Gearbox	"PhBr"	4	Not included		1.2114
Perception part	304 SS	2	Steel, chromium steel 18/8 {GLO} market for, Alloc Def,U		0.605702
Other (not incl.)		1			0.302851
		1042	kg total (Authors state 1162 kg, but that includes 120 mL of lubricant		315.571	kg total for 8 mgd
			as if it is 120 kg. Actual mass total should be 1042 kg.
		1037	kg included		314.057	kg included in case study
						0.995202
The design reference flow in Lee et al., 2012, was 1x10^5 m3/day
	100000	m3/day
	26.4156	MGD
So, materials above are scaled accordingly to 8 mgd
For 304 SS, this is equivalent to 18/8 stainless steel (18% chromium, 8% nickel).
Econinvent only offers LCI data for 18/8 SS. As a result, this is used throughout
including where 316 SS was specified by Lee et al., 2012.
(Reference: Life Cycle Inventories of Metals, Ecoinvent Centre - Swill Centre for Life Cycle Inventories.
Report No. 10, Data v2.1, 2009, Classen et al., 2009, page 5)
Materials list, consolidated by material
Process			Mass required, kg
Glass tube, borosilicate {GLO} market for, Alloc Def, U			99.9409
Steel, low-alloyed, hot rolled {GLO} market for, Alloc Def, U			60.5702
Steel, chromium steel 18/8 {GLO} market for, Alloc Def,U			144.46
Aluminum, primary, liquid {GLO} market for, Alloc Def, U			9.08553
			314.057
			kg total. Checks out with above

## Sheet: Chemical Costs
All calculations assume an 8 mgd flow rate, 25-year life				Inflation Rate	0.03	per year
Chemical Alternatives:
Chemical	Unit Cost		Year	Present Cost	Unit	Strength						lb/d used	Cost/day	Cost/yr
Chlorine Gas, liquid, one-ton cylinders	0.15	per lb	2000	0.233695	per lb			(=$467/ton cylinder)				400	93.478	34119.5
Sulfur dioxide, liquid, one-ton cylinders	0.3	per lb	2012	0.327818	per lb			(=600/ton cylinder)				120	39.3382	14358.4
Sodium Hypochlorite, bulk liquid	0.7	per gal	2012	0.764909	per gal	1.25	lb/gal	equiv. to	0.611927	per lb of NaOCl		400	244.771	89341.4
Sodium bisulfite, liquid	1.7	per gal	2012	1.85764	per gal	3.25	lb/gal	equiv. to	0.57158	per lb of Na2SO3		96.84	55.3518	20203.4
Assumed sodium sulfite solution cost is same as sodium bisulfite.
UV Alternative:
Electricity cost	0.1019	per kWh, EIA all sector price, 2015			US EIA, Table 5.6.B, Average retail price of electricity…, US DOE, Washington DC, accessed 4/4/15.
Power required per day at 8mgd	757	kWh/day			http://www.eia.gov/electricity/monthly/epm_table_grapher.cfm?t=epmt_5_6_b
Annual power requirement	276305	kWh/yr
Annual cost, with fixed cost of electricity	28155.5	kWh/yr
UV Equipment Cost:	400000	assumed by author
		Based on $700,000 total capital cost estimate (Das, 2002), minus $50,000 (calculated in this study) for concrete and reinforcing steel,
		then scaled from 10 mgd to 8 mgd, and assuming the balance is sitework, equipment building/protection, electrical, O&P, etc.
Enegineering Economic Analysis:	Chlorine	UV	Hypochlorite
Capital Cost	283590	446566	283590		Incl. concrete and steel (all options) plus UV equipment (UV only)
Annual O&M Cost	48477.9	28155.5	109545
Net Present Value	1128000	937000	2191000
i	0.03
n	25	years
